# Supplementary material
Source: PubMed Central journal article supplement (PMC9125132)
Supplement: sj-pdf-1-ijt-10.1177_10915818221095489.pdf [file sj-pdf-1-ijt-10.1177_10915818221095489.pdf]

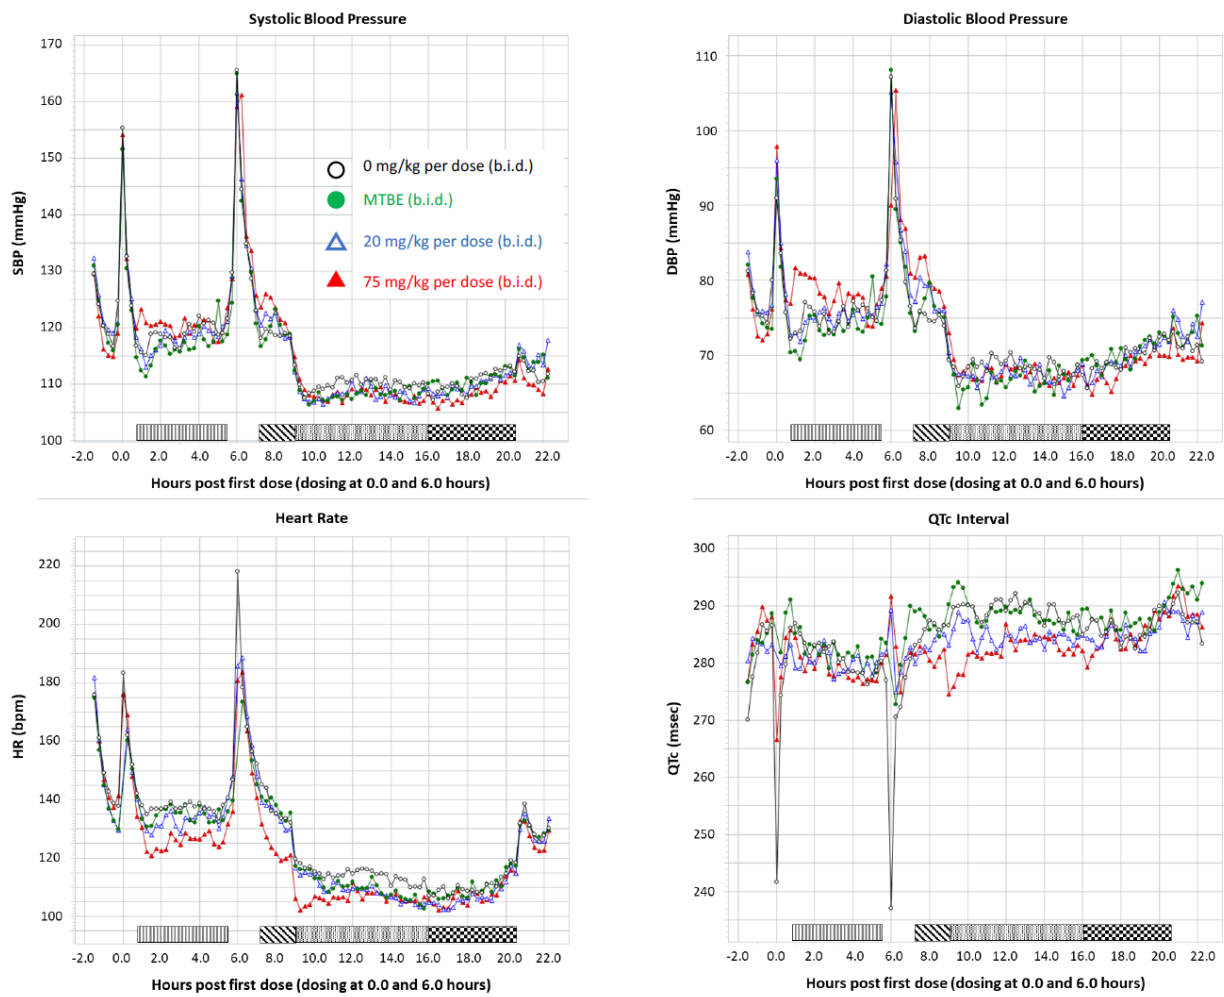

**Supplemental Figure 1. Summary of effects of nirmatrelvir cardiovascular parameters in cynomolgus monkeys.** Data was acquired as 1 min means and collated into 15 min means for graphical presentation. Each individual animal was administered each treatment with sufficient washout period between dosing days (n=8). Shaded boxes highlight the postdose periods (0.75-5.5 HPD, 7.25-9 HPD, 9.25-16 HPD, 16.25-20.5 HPD) that were summarized for each dose group and used in subsequent statistical analysis.
