# Supplementary material
Source: PubMed Central journal article supplement (PMC9125132)
Supplement: sj-pdf-2-ijt-10.1177_10915818221095489.pdf [file sj-pdf-2-ijt-10.1177_10915818221095489.pdf]

Supplemental Table 1. Vehicle control data for measured parameters in cynomolgus monkey cardiovascular study.

| Endpoint                        | Time Bin Postdose (h) |                    |                   |                   |
|---------------------------------|-----------------------|--------------------|-------------------|-------------------|
|                                 | 0.75-5.5              | 7.25-9.0           | 9.25-16.0         | 16.25-20.0        |
| Systolic Blood Pressure (mmHg)  | 118.87 ± 1.68 (8)     | 118.17 ± 1.94 (8)  | 109.95 ± 1.50 (8) | 110.6 ± 1.62 (8)  |
| Diastolic Blood Pressure (mmHg) | 75.07 ± 2.54 (8)      | 74.12 ± 2.62 (8)   | 68.41 ± 2.46 (8)  | 69.96 ± 2.53 (8)  |
| Heart Rate (beats/min)          | 137.59 ± 5.01 (8)     | 134.96 ± 3.45 (8)  | 113.89 ± 3.09 (8) | 110.72 ± 3.19 (8) |
| QTc Interval (ms)               | 281.24 ± 10.32 (8)    | 285.75 ± 10.11 (8) | 289.12 ± 8.95 (8) | 286.14 ± 9.60 (8) |

Supplemental Table 2. Fold changes in organ weight versus vehicle control following administration of nirmatrelvir in a 2-week rat toxicity study

| Study Phase | Dosing                   | Organ                 | Male                |                            |       |       |                    | Female              |                            |       |       |                    |
|-------------|--------------------------|-----------------------|---------------------|----------------------------|-------|-------|--------------------|---------------------|----------------------------|-------|-------|--------------------|
|             |                          |                       | Dose (mg/kg) (q.d.) |                            |       |       |                    | Dose (mg/kg) (q.d.) |                            |       |       |                    |
|             |                          |                       | 0                   | 0 <sup>a</sup>             | 60    | 200   | 1000               | 0                   | 0 <sup>a</sup>             | 60    | 200   | 1000               |
|             |                          |                       | Mean                | Fold Change Versus Vehicle |       |       |                    | Mean                | Fold Change Versus Vehicle |       |       |                    |
|             | Liver                    | Absolute (g)          | 7.9507              | 1.03x                      | 1.02x | 1.09x | 1.36x <sup>#</sup> | 5.2167              | 0.95x                      | 0.95x | 1.07x | 1.59x <sup>#</sup> |
|             |                          | Ratio to body weight  | 2.8291              | 1.03x                      | 1.03x | 1.10x | 1.35x <sup>#</sup> | 2.8120              | 0.98x                      | 1.02x | 1.11x | 1.54x <sup>#</sup> |
|             |                          | Ratio to brain weight | 4.1604              | 1.01x                      | 1.00x | 1.09x | 1.35x <sup>#</sup> | 2.9234              | 0.92x                      | 0.94x | 1.06x | 1.54x <sup>#</sup> |
|             | Heart                    | Absolute (g)          | 0.9171              | 1.02x                      | 0.98x | 0.99x | 0.98x              | 0.7024              | 0.96x                      | 0.93x | 0.92x | 0.88x <sup>#</sup> |
|             |                          | Ratio to body weight  | 0.3264              | 1.03x                      | 0.99x | 1.00x | 0.98x              | 0.3807              | 0.99x                      | 1.00x | 0.95x | 0.85x <sup>#</sup> |
|             |                          | Ratio to brain weight | 0.4807              | 1.01x                      | 0.96x | 0.99x | 0.97x              | 0.3951              | 0.92x                      | 0.92x | 0.91x | 0.85x <sup>#</sup> |
|             | Brain <sup>b</sup>       | Absolute (g)          | 1.9140              | 1.01x                      | 1.02x | 1.00x | 1.01x              | 1.7830              | 1.03x                      | 1.01x | 1.01x | 1.03x              |
|             |                          | Ratio to body weight  | 0.6846              | 1.01x                      | 1.03x | 1.01x | 1.01x              | 0.9630              | 1.08x                      | 1.09x | 1.05x | 1.00x              |
|             | Body weight <sup>b</sup> | Absolute (g)          | 281.29              | 1.00x                      | 0.99x | 0.99x | 1.00x              | 185.49              | 0.96x                      | 0.93x | 0.96x | 1.03x              |
| Recovery    | Liver                    | Absolute (g)          | 9.2806              | 0.98x                      | 0.92x | 0.96x | 0.91x              | 5.3062              | 1.01x                      | 1.03x | 1.14x | 1.14x              |
|             |                          | Ratio to body weight  | 2.7554              | 1.00x                      | 0.94x | 1.01x | 1.06x              | 2.8661              | 0.97x                      | 0.97x | 1.00x | 1.07x              |

|  |                          |                       |        |       |       |       |       |        |       |       |       |       |
|--|--------------------------|-----------------------|--------|-------|-------|-------|-------|--------|-------|-------|-------|-------|
|  |                          | Ratio to brain weight | 4.5582 | 0.97x | 0.94x | 0.95x | 0.94x | 2.9576 | 0.98x | 0.99x | 1.09x | 1.08x |
|  | Heart                    | Absolute (g)          | 1.0302 | 1.01x | 0.97x | 0.99x | 0.87x | 0.6960 | 1.10x | 1.10x | 1.08x | 1.02x |
|  |                          | Ratio to body weight  | 0.3057 | 1.04x | 1.01x | 1.06x | 1.02x | 0.3769 | 1.04x | 1.04x | 0.95x | 0.96x |
|  |                          | Ratio to brain weight | 0.5057 | 1.00x | 0.99x | 0.99x | 0.90x | 0.3873 | 1.06x | 1.06x | 1.04x | 0.97x |
|  | Brain <sup>b</sup>       | Absolute (g)          | 2.0326 | 1.02x | 0.98x | 1.01x | 0.97x | 1.8008 | 1.03x | 1.04x | 1.04x | 1.05x |
|  |                          | Ratio to body weight  | 0.6098 | 1.04x | 1.01x | 1.06x | 1.13x | 0.9720 | 0.98x | 0.98x | 0.92x | 0.99x |
|  | Body weight <sup>b</sup> | Absolute (g)          | 335.94 | 0.98x | 0.98x | 0.95x | 0.85x | 185.94 | 1.05x | 1.06x | 1.13x | 1.06x |

<sup>a</sup>Denotes MBTE control. <sup>b</sup>Included for evaluating organ to brain weight and body weight ratios. <sup>#</sup>Denotes nirmatrelvir-related finding.

Supplemental Table 3. Fold changes in organ weight versus vehicle control following administration of nirmatrelvir in a 1-month rat toxicity study

| Study Phase |       |                       | Male                       |                    |                    |                    | Female                     |                    |                    |                    |
|-------------|-------|-----------------------|----------------------------|--------------------|--------------------|--------------------|----------------------------|--------------------|--------------------|--------------------|
|             |       |                       | Dose (mg/kg) (q.d.)        |                    |                    |                    | Dose (mg/kg) (q.d.)        |                    |                    |                    |
|             |       |                       | 0                          | 60                 | 200                | 1000               | 0                          | 60                 | 200                | 1000               |
|             |       | Mean                  | Fold Change Versus Vehicle |                    |                    | Mean               | Fold Change Versus Vehicle |                    |                    |                    |
| Dosing      | Liver | Absolute (g)          | 7.7336                     | 1.07x <sup>#</sup> | 1.14x <sup>#</sup> | 1.49x <sup>#</sup> | 4.8982                     | 1.07x <sup>#</sup> | 1.25x <sup>#</sup> | 1.83x <sup>#</sup> |
|             |       | Ratio to body weight  | 2.3772                     | 1.08x <sup>#</sup> | 1.15x <sup>#</sup> | 1.53x <sup>#</sup> | 2.5051                     | 1.08x <sup>#</sup> | 1.21x <sup>#</sup> | 1.75x <sup>#</sup> |
|             |       | Ratio to brain weight | 3.9927                     | 1.07x <sup>#</sup> | 1.14x <sup>#</sup> | 1.46x <sup>#</sup> | 2.6699                     | 1.12x <sup>#</sup> | 1.24x <sup>#</sup> | 1.79x <sup>#</sup> |
|             | Heart | Absolute (g)          | 0.9307                     | 0.98x              | 0.99               | 0.95               | 0.6736                     | 0.98x              | 1.08x              | 0.98x              |
|             |       | Ratio to body weight  | 0.2861                     | 1.00x              | 1.01x              | 0.98x              | 0.3450                     | 0.98x              | 1.06x              | 0.94x              |
|             |       | Ratio to brain weight | 0.4810                     | 0.97x              | 0.99x              | 0.93x              | 0.3669                     | 1.02x              | 1.08x              | 0.96x              |

|          |                          |                       |        |       |       |                    |        |       |       |       |
|----------|--------------------------|-----------------------|--------|-------|-------|--------------------|--------|-------|-------|-------|
|          | Brain <sup>a</sup>       | Absolute (g)          | 1.9378 | 1.00x | 1.00x | 1.02x              | 1.8369 | 0.96x | 1.00  | 1.02x |
|          |                          | Ratio to body weight  | 0.5973 | 1.02x | 1.01x | 1.05x              | 0.9433 | 0.96x | 0.97  | 0.97x |
|          |                          |                       |        |       |       |                    |        |       |       |       |
|          | Body weight <sup>a</sup> | Absolute (g)          | 325.48 | 0.98x | 0.98x | 0.97x              | 195.41 | 1.00x | 1.03x | 1.05x |
|          |                          |                       |        |       |       |                    |        |       |       |       |
| Recovery | Liver                    | Absolute (g)          | 8.4948 | 1.08x | 0.94x | 1.18x <sup>#</sup> | 5.4952 | 1.08x | 1.05x | 1.00x |
|          |                          | Ratio to body weight  | 2.4421 | 1.03x | 1.01x | 1.11x <sup>#</sup> | 2.5320 | 1.05x | 1.05x | 1.04x |
|          |                          | Ratio to brain weight | 4.2337 | 1.08x | 0.96x | 1.20x <sup>#</sup> | 3.0316 | 1.04x | 1.01x | 0.97x |
|          |                          |                       |        |       |       |                    |        |       |       |       |
|          | Heart                    | Absolute (g)          | 0.9468 | 1.08x | 1.04x | 1.08x              | 0.7596 | 1.08x | 0.96x | 0.91x |
|          |                          | Ratio to body weight  | 0.2720 | 1.04x | 1.12x | 1.03x              | 0.3534 | 1.04x | 0.96x | 0.94x |
|          |                          | Ratio to brain weight | 0.4719 | 1.08x | 1.06x | 1.10x              | 0.4183 | 1.05x | 0.93x | 0.89x |
|          |                          |                       |        |       |       |                    |        |       |       |       |
|          | Brain <sup>a</sup>       | Absolute (g)          | 2.0058 | 1.00x | 0.98x | 0.98x              | 1.8158 | 1.04x | 1.04x | 1.03x |
|          |                          | Ratio to body weight  | 0.5773 | 0.96x | 1.05x | 0.94x              | 0.8438 | 1.00x | 1.04x | 1.07x |
|          |                          |                       |        |       |       |                    |        |       |       |       |
|          | Body weight <sup>a</sup> | Absolute (g)          | 347.94 | 1.05x | 0.94x | 1.06x              | 216.78 | 1.03x | 0.99x | 0.96x |
|          |                          |                       |        |       |       |                    |        |       |       |       |

<sup>a</sup>Included for evaluating organ to brain weight and body weight ratios. <sup>#</sup>Denotes nirmatrelvir-related finding.
